# Supplementary material for: Microwave-assisted expeditious approach towards benzimidazole acrylonitrile derivatives exploring a new silica supported SBPTS catalyst
Source: Royal Society of Chemistry journal article supplement (doi:10.1039/c8nj01436a), 2018-01-01
Supplement: c8nj01436a1.pdf [file c8nj01436a1.pdf]

## Supplementary Information

### Microwave assisted expeditious approach towards benzimidazole acrylonitrile derivatives exploring new silica supported SBPTS catalyst

Faheem Ahmad,<sup>a,b,\*\*</sup> Mehtab Parveen<sup>a,\*</sup>

<sup>a</sup>Department of Chemistry, Aligarh Muslim University, Aligarh, 202002, India

<sup>b</sup>School of Chemical Engineering, Chonbuk National University, Jeonju, Republic of Korea

---

---

**Corresponding authors email address:**

\*mehtab.organic2009@ gmail.com (Prof. M. Parveen)

\*\*mirzafaheem.org@gmail.com (Dr. F. Ahmad)

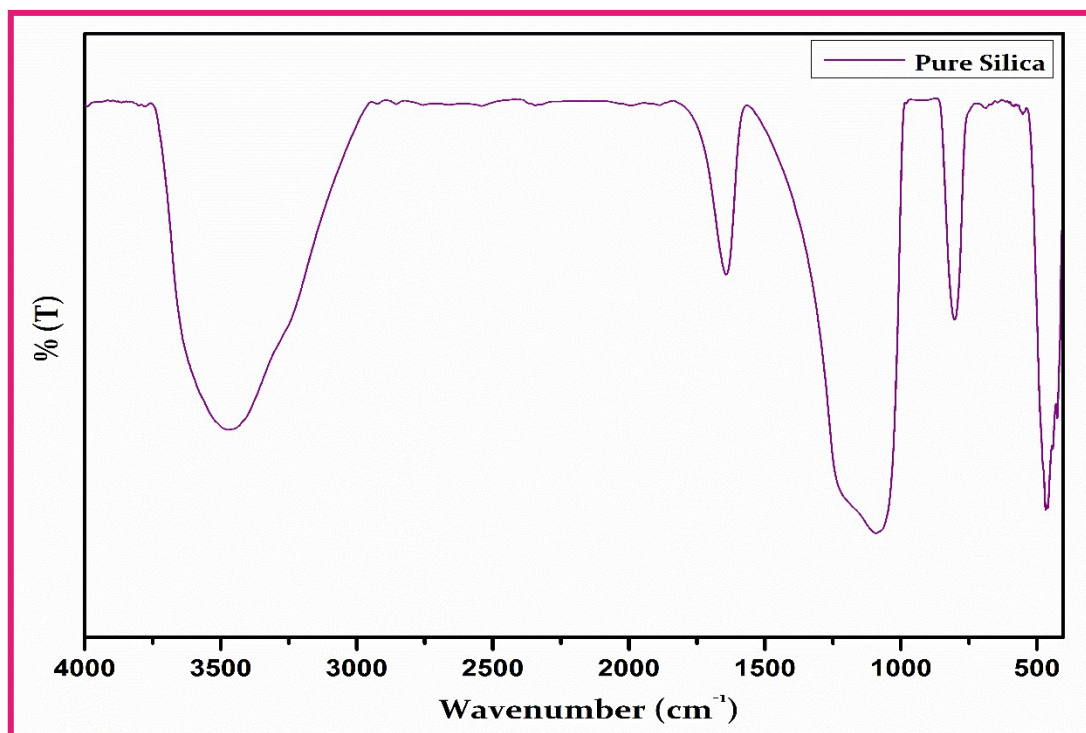

Fig. S1(a) FT-IR spectrum of pure silica

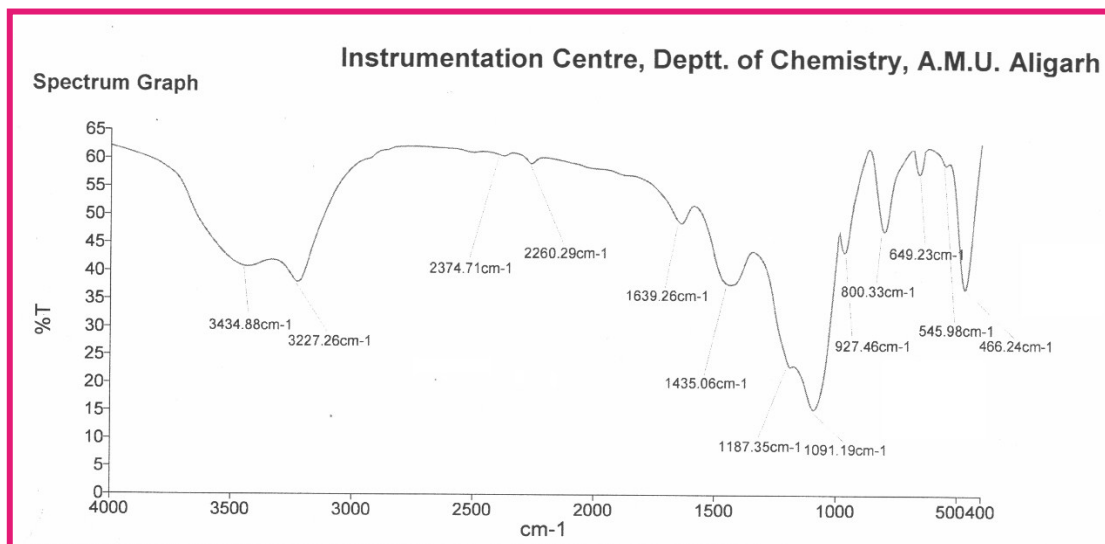

Fig. S1(b) FT-IR spectrum of pure silica-boric acid

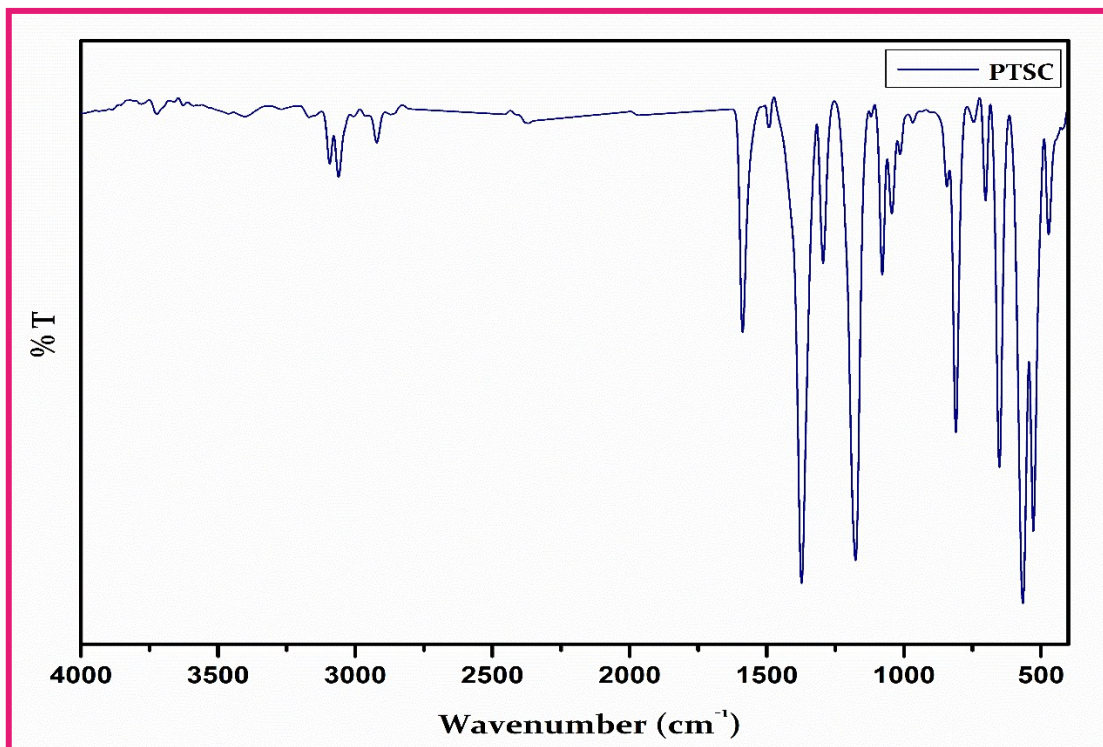

Fig. S1(c) FT-IR spectrum of *p*-toluenesulfonyl chloride

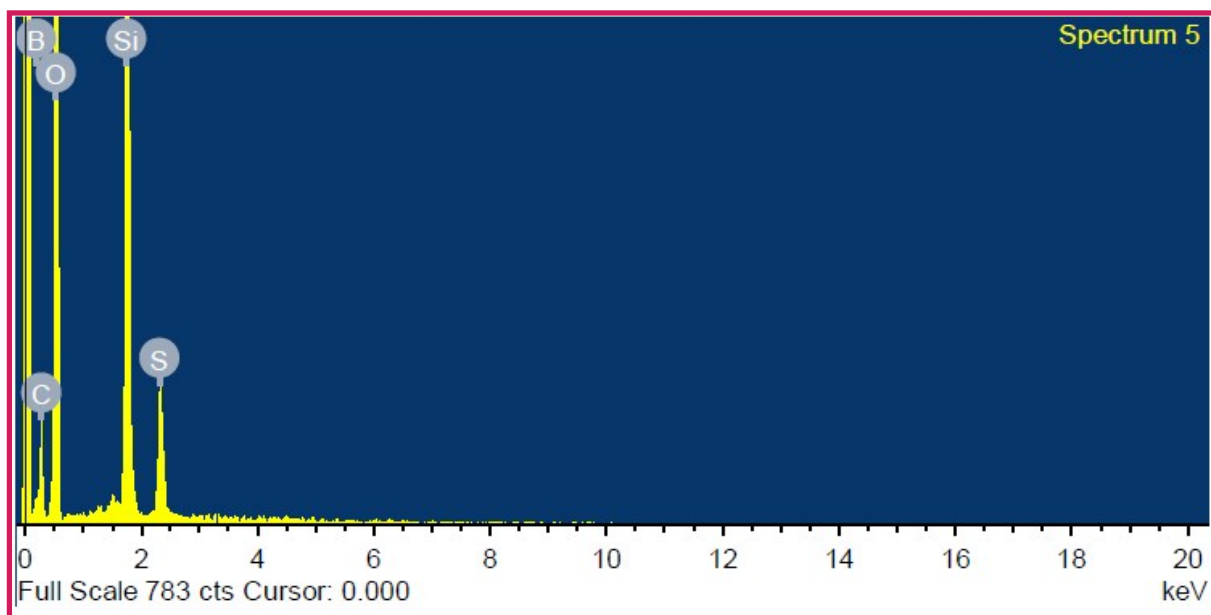

Fig. S2 EDX analysis of the SBPTS catalyst

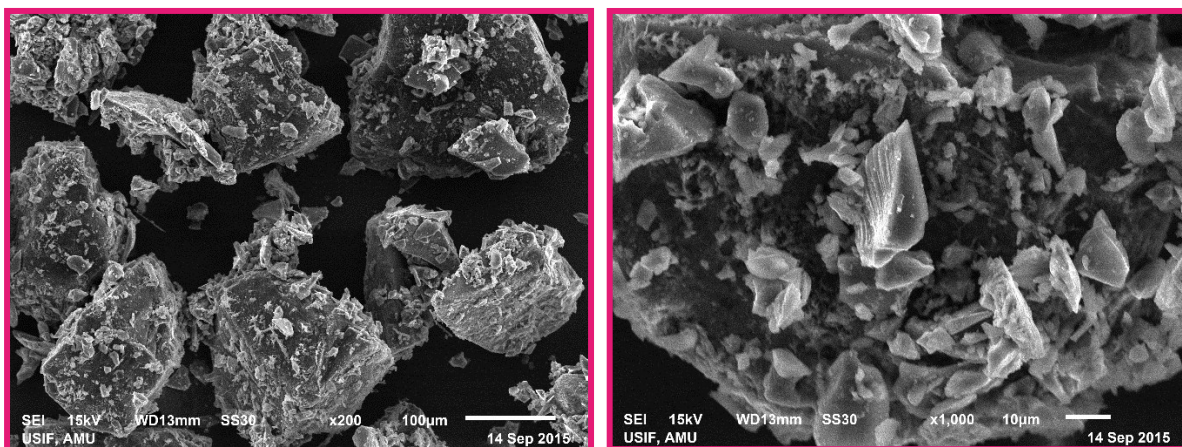

**Fig. S3** SEM micrograph of the recovered catalyst

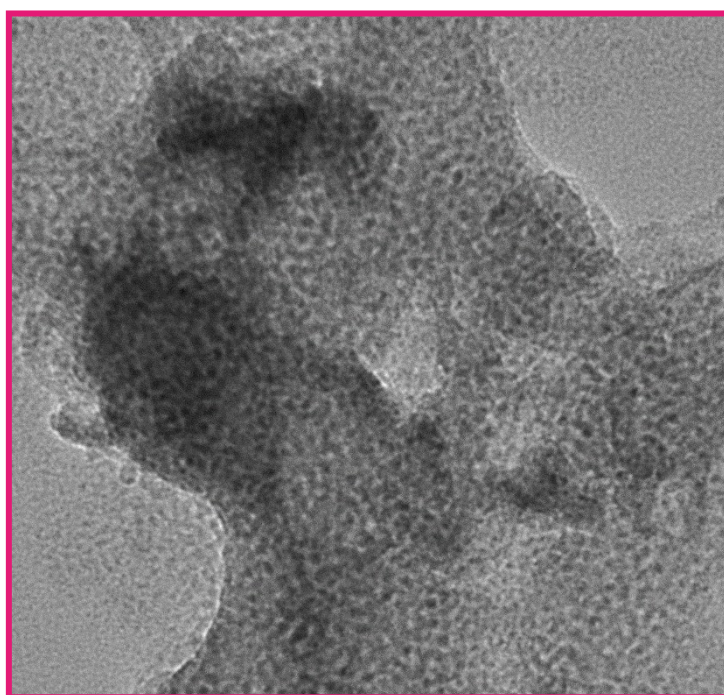

**Fig. S4** TEM micrograph of the recovered catalyst

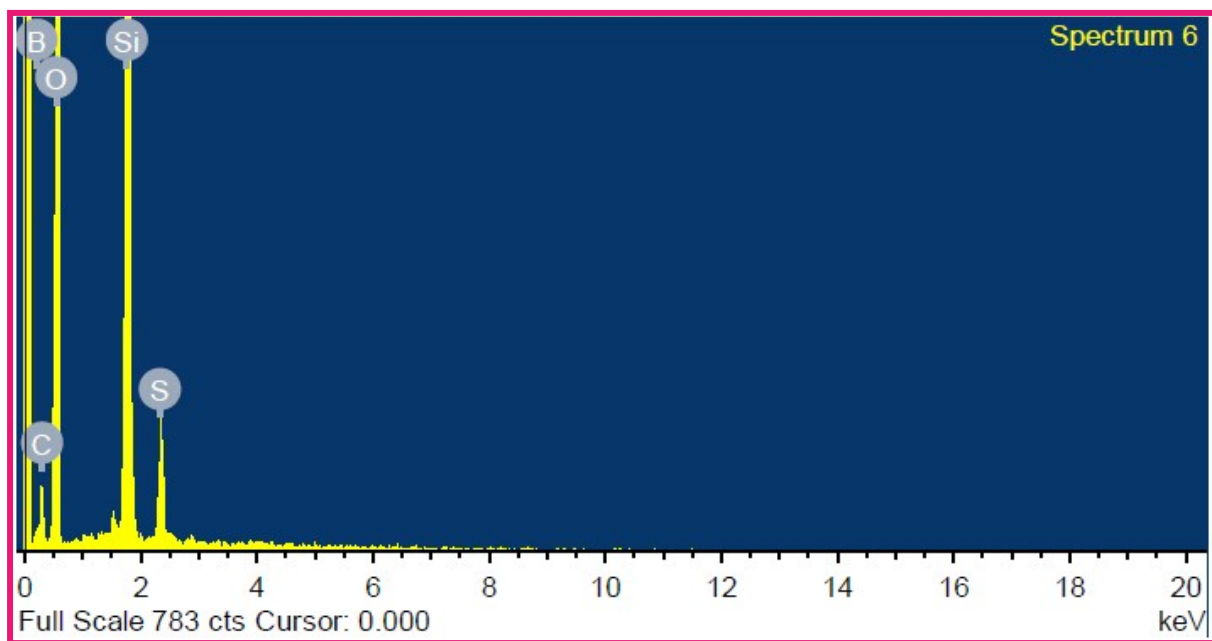

**Fig. S5** EDX analysis of the recovered catalyst



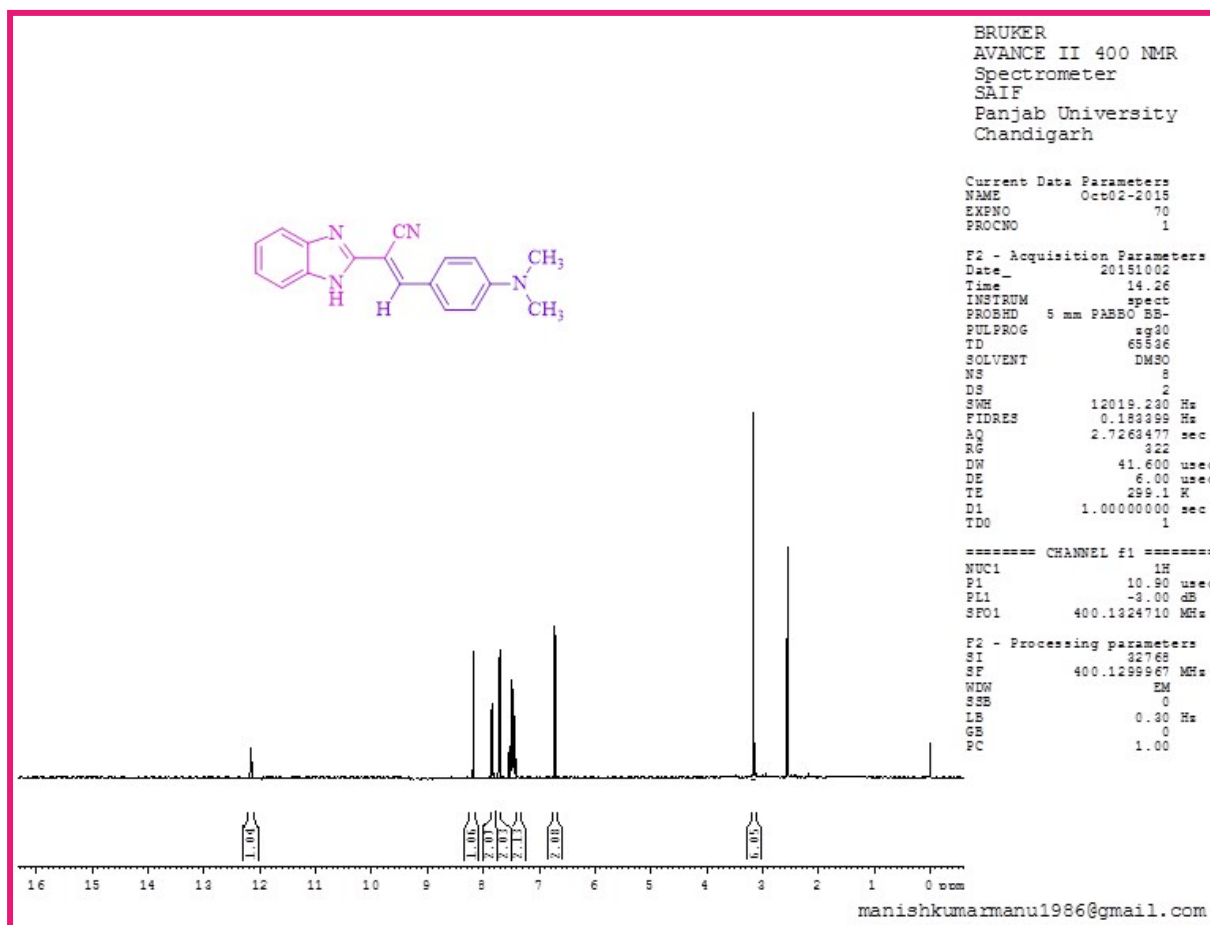

**Fig. S6**  $^1\text{H}$  NMR spectrum of compound **3a**

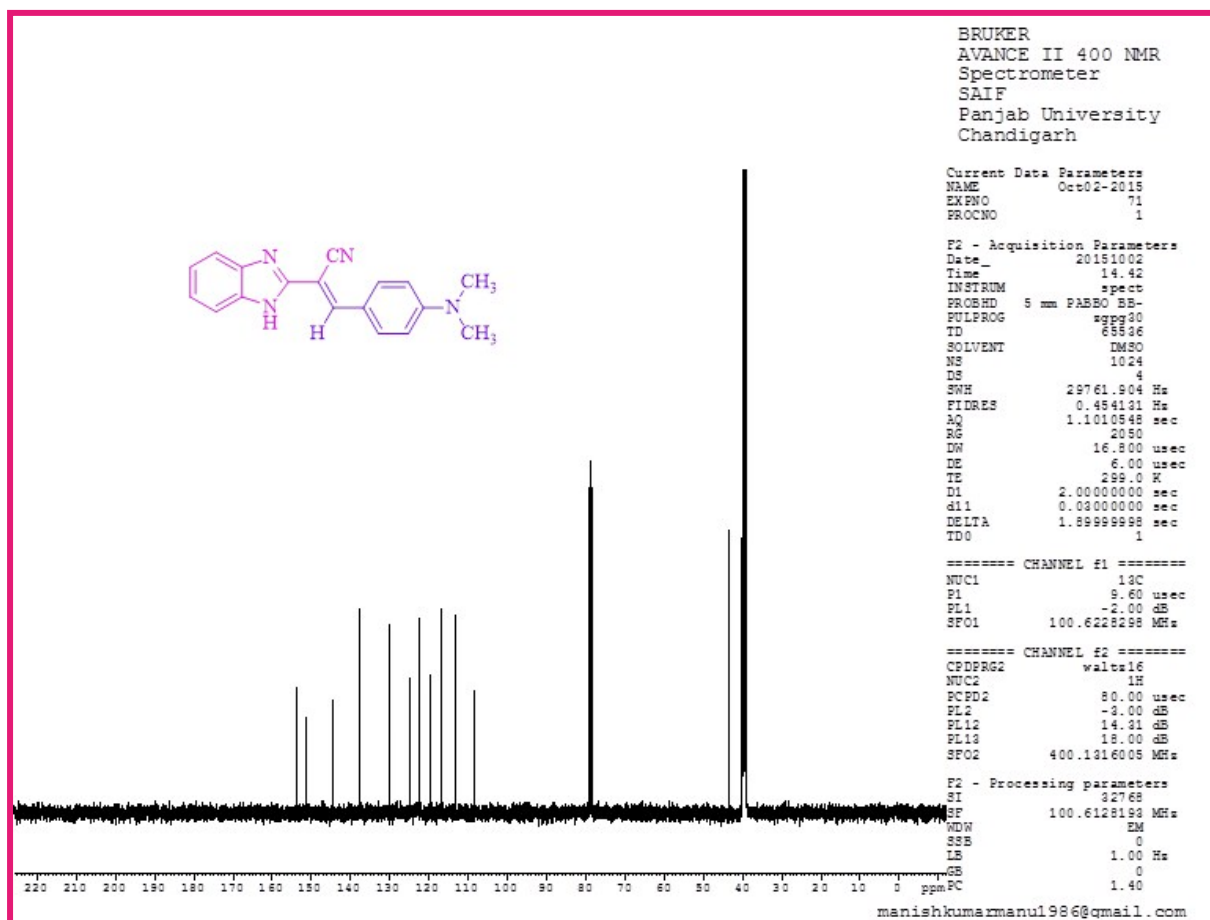

**Fig. S7**  $^{13}\text{C}$  NMR spectrum of compound **3a**

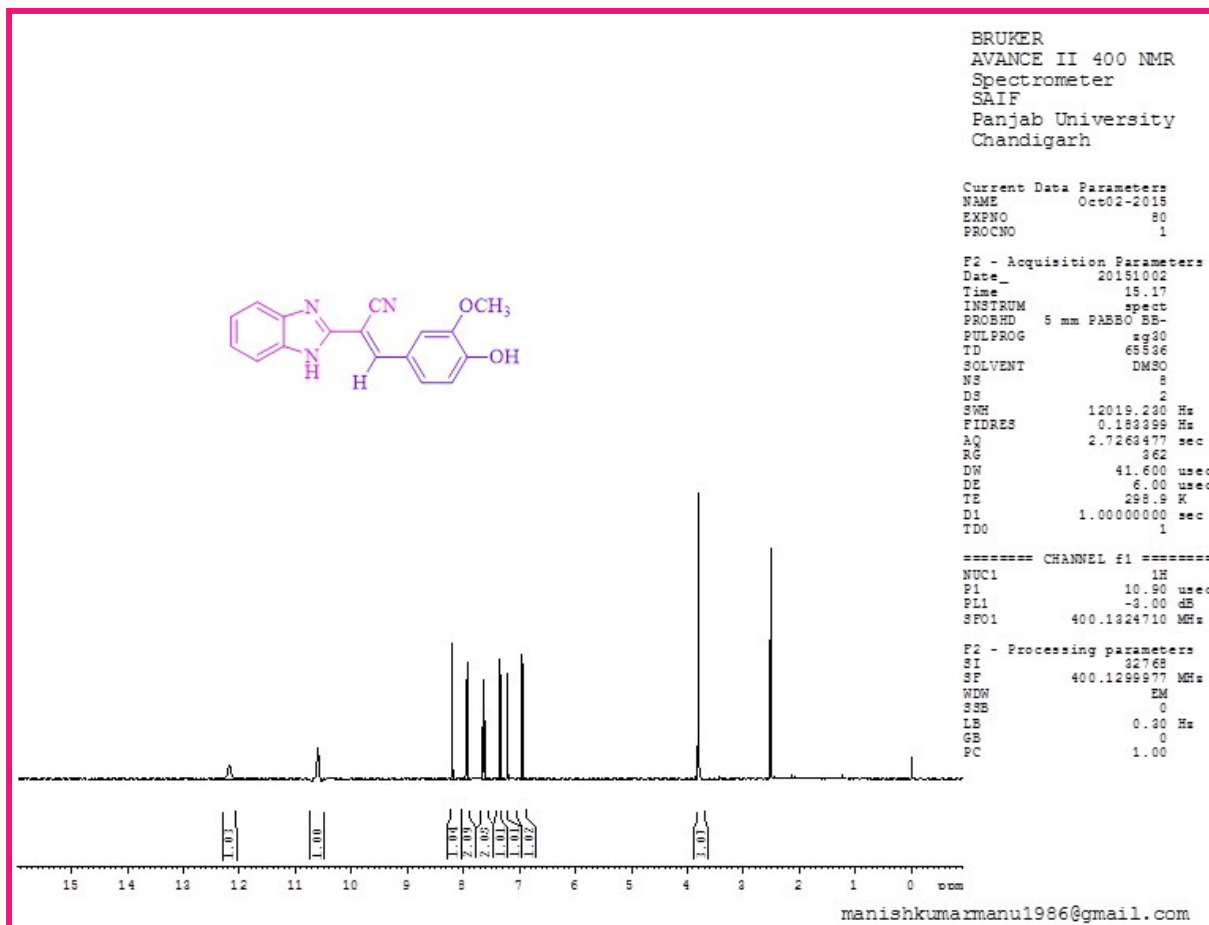

Fig. S8 <sup>1</sup>H NMR spectrum of compound **3e**



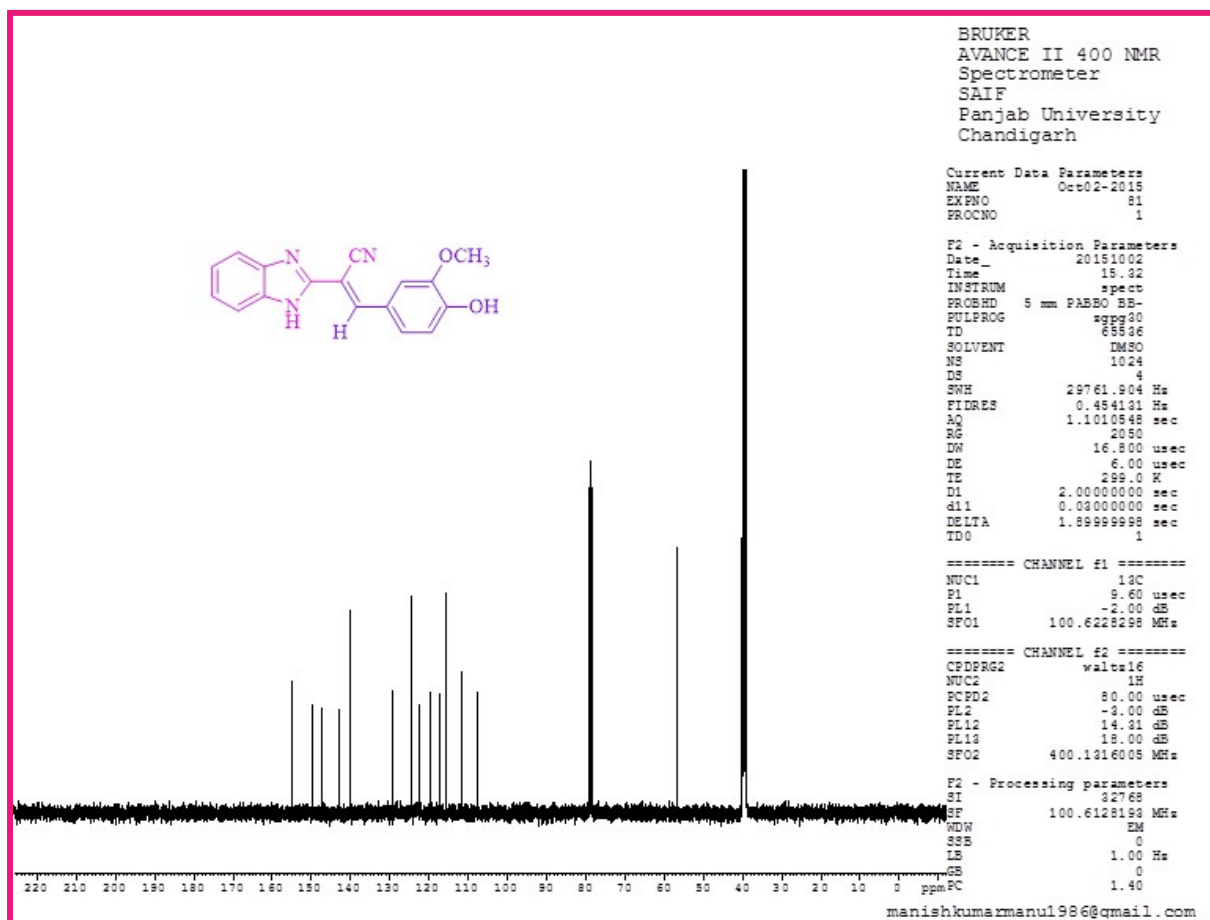

**Fig. S9**  $^{13}\text{C}$  NMR spectrum of compound **3e**

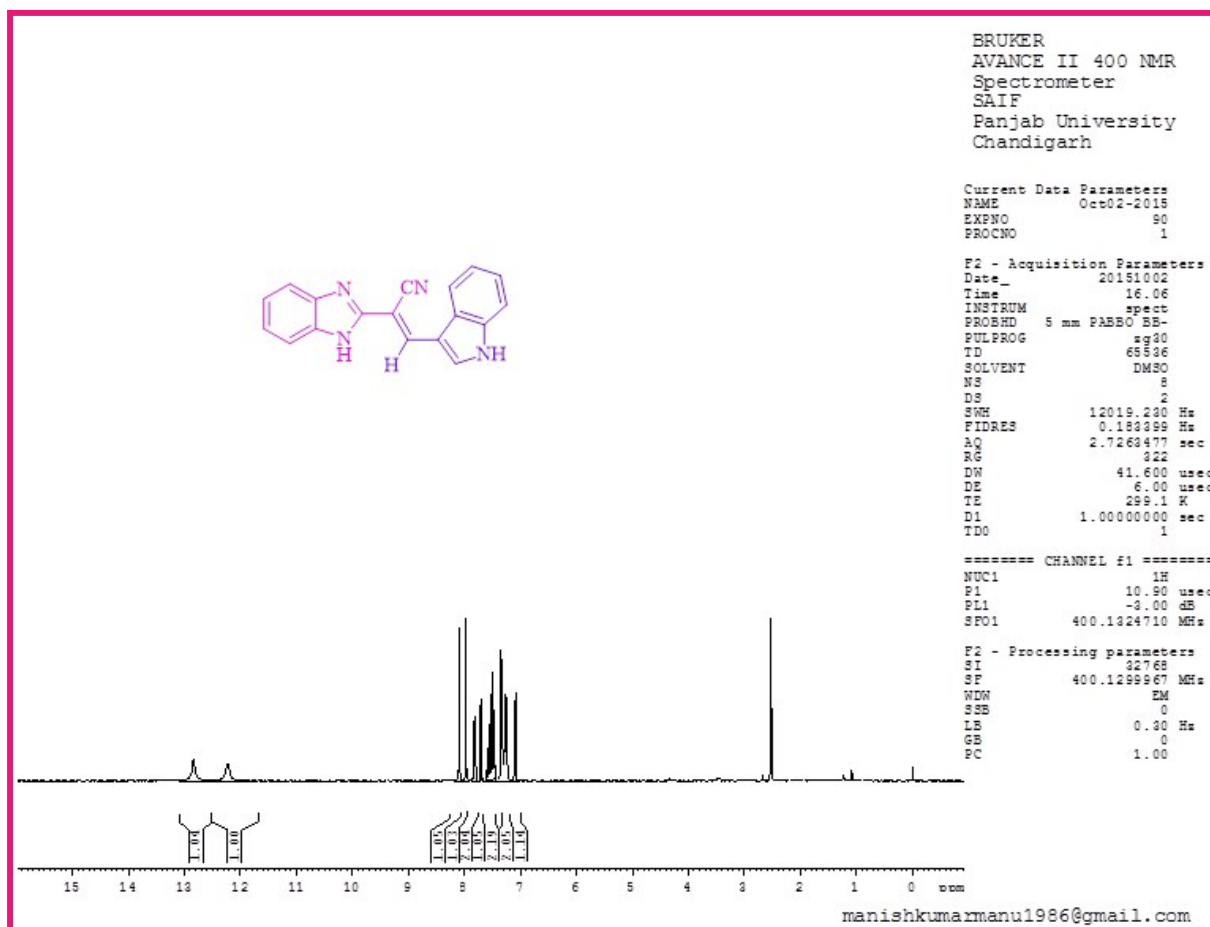

**Fig. S10** <sup>1</sup>H NMR spectrum of compound **3g**

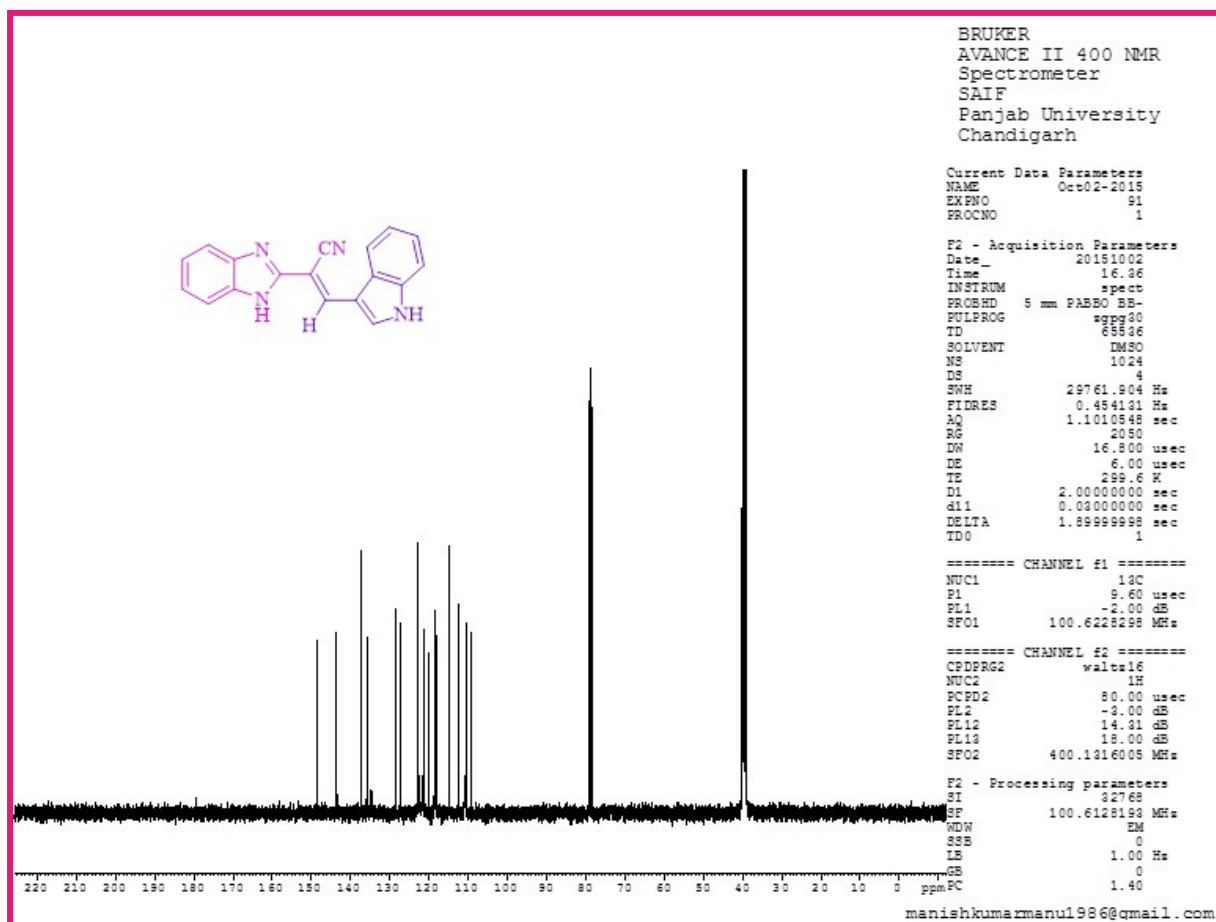

Fig. S11 <sup>13</sup>C NMR spectrum of compound 3g

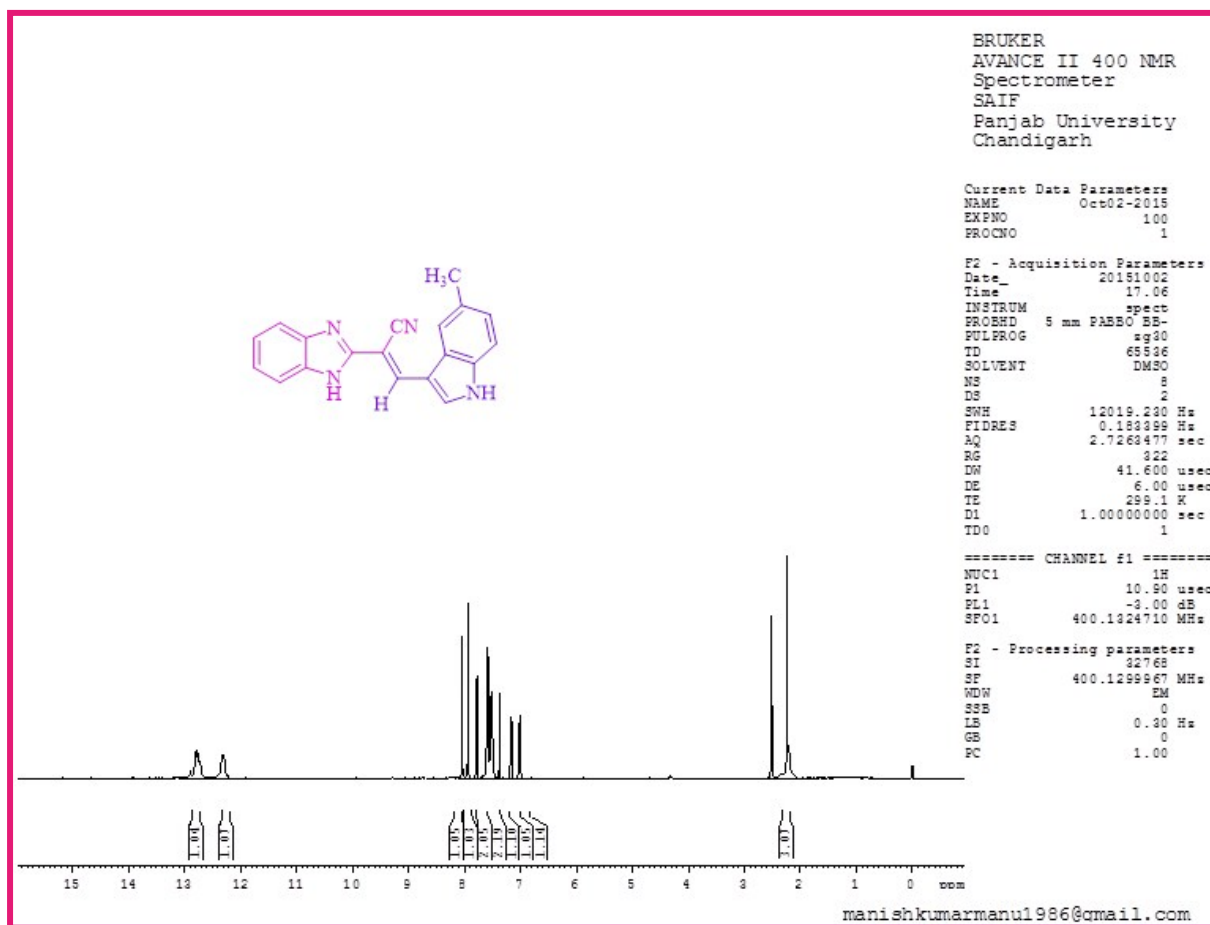

**Fig. S12**  $^1\text{H}$  NMR spectrum of compound **3i**

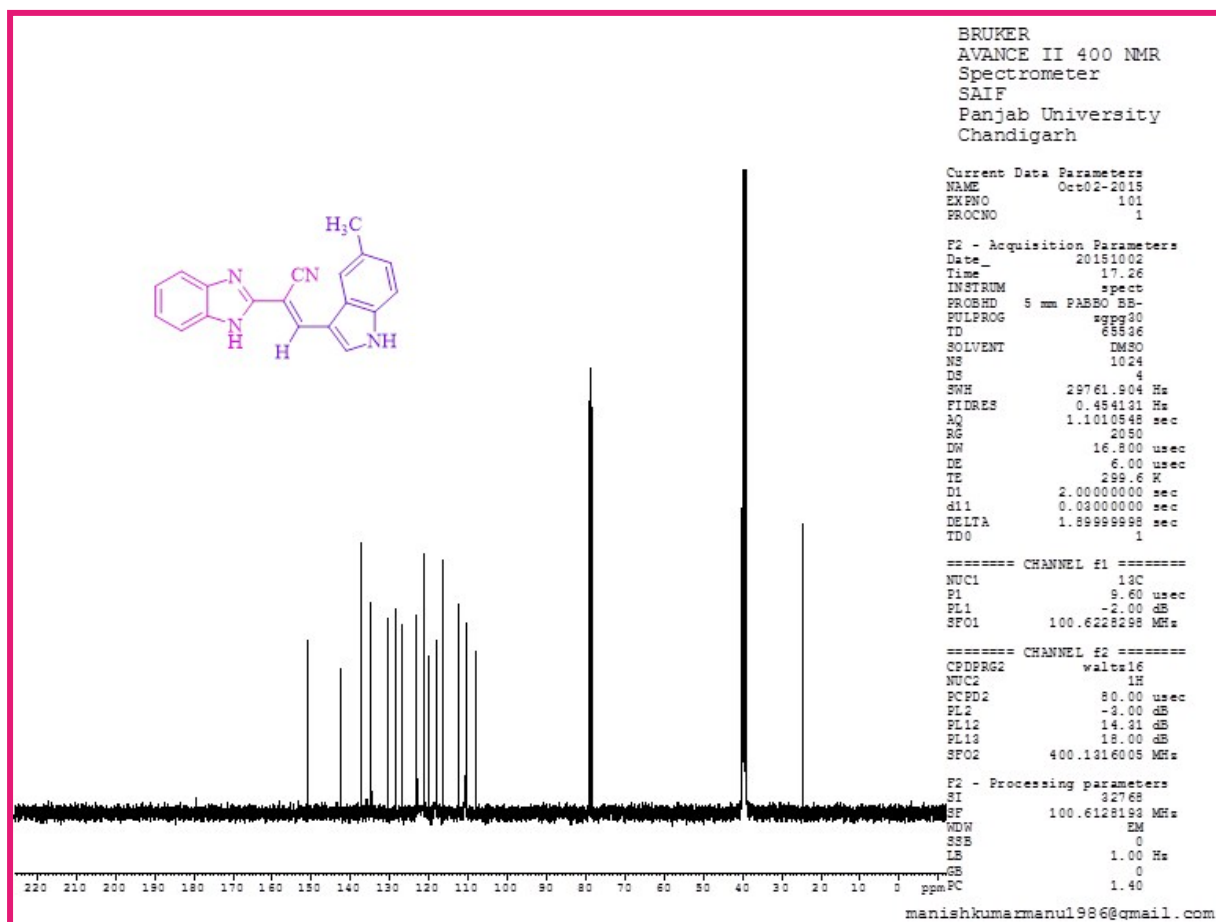

Fig. S13 <sup>13</sup>C NMR spectrum of compound 3i

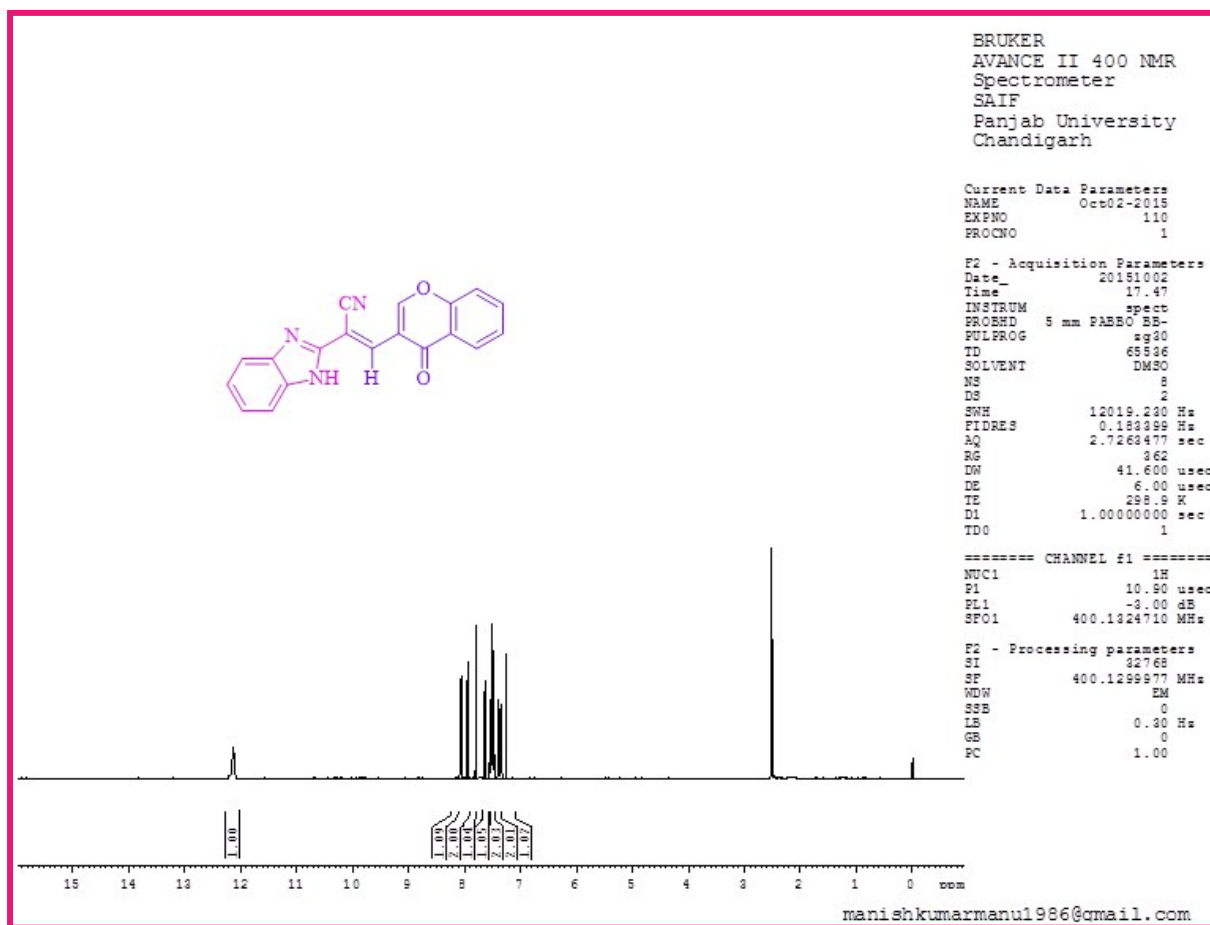

**Fig. S14**  $^1\text{H}$  NMR spectrum of compound **3j**



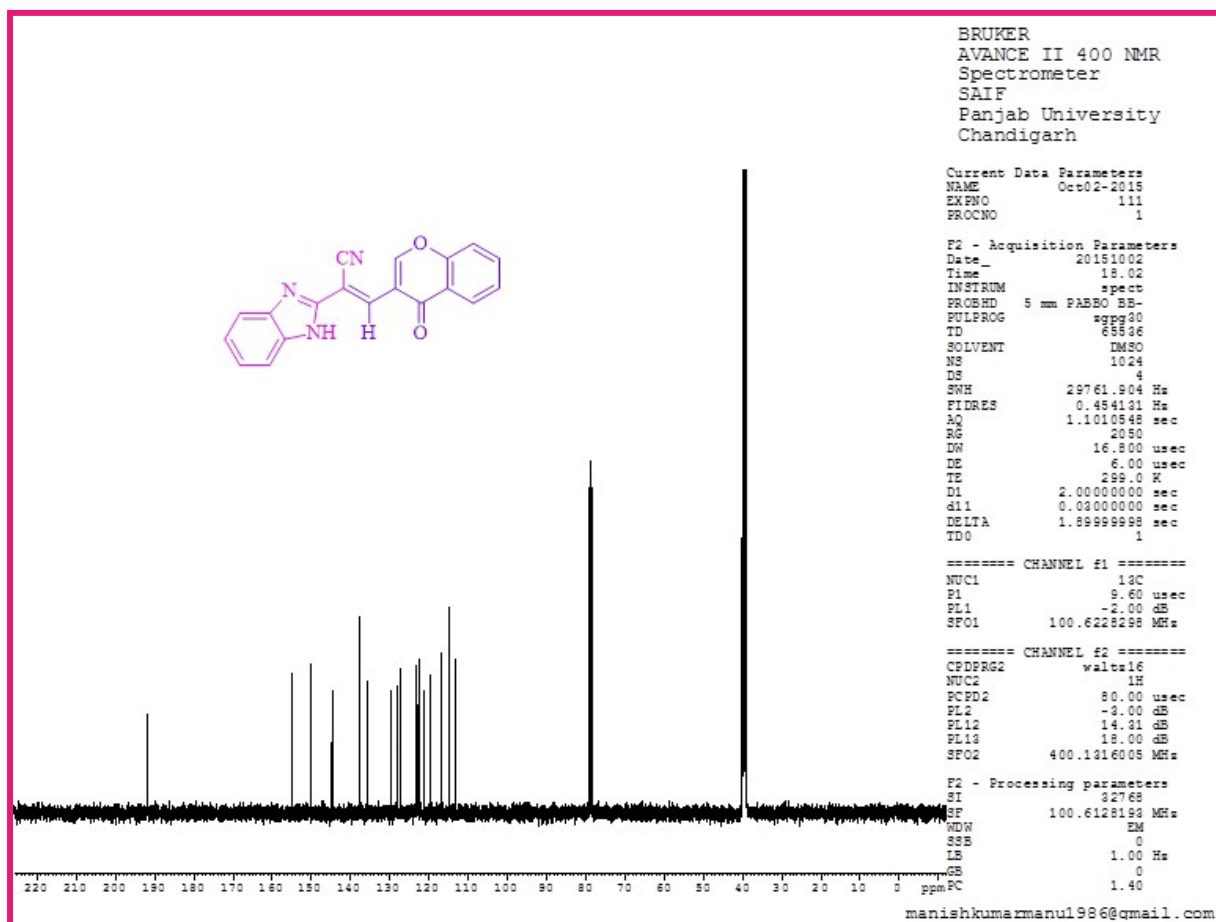

Fig. S15 <sup>13</sup>C NMR spectrum of compound 3j

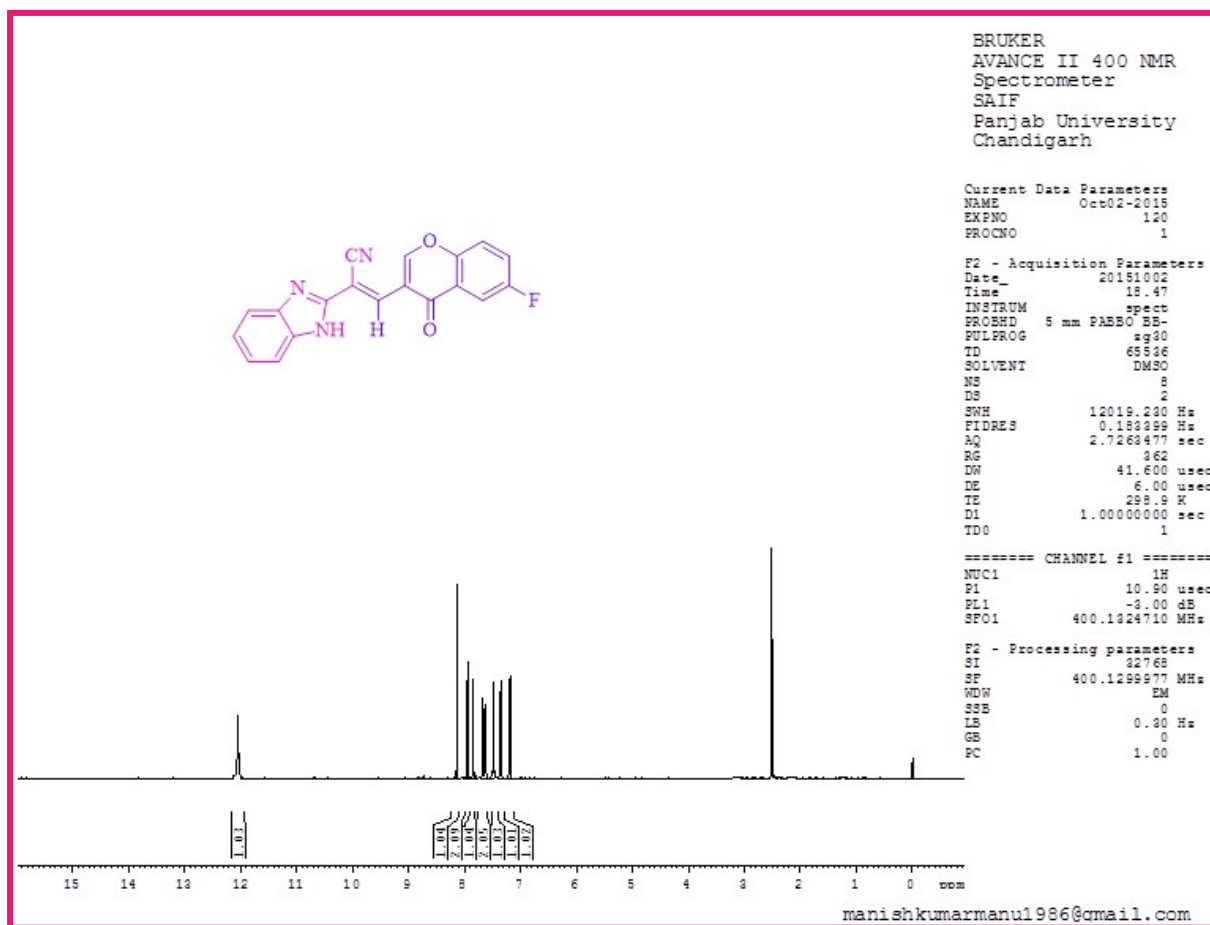

**Fig. S16**  $^1\text{H}$  NMR spectrum of compound **31**

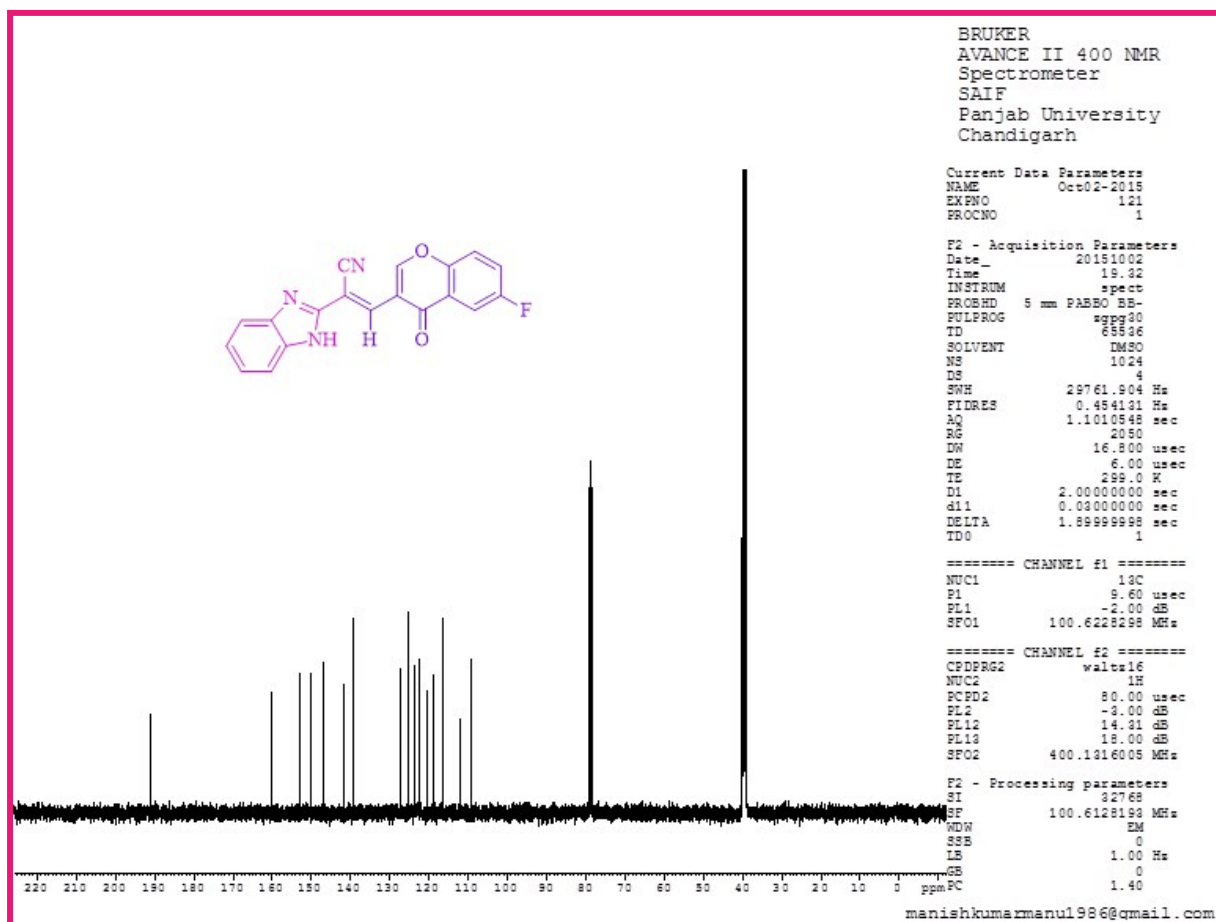

Fig. S17 <sup>13</sup>C NMR spectrum of compound 31
